# Supplementary material for: Pharmaceutical quality assurance of local private distributors: a secondary analysis in 13 low-income and middle-income countries
Source: PubMed Central journal article supplement — BMJ Glob Health. 2018 Jun 9;3(3):e000771. doi: 10.1136/bmjgh-2018-000771 (PMC6001909; doi:10.1136/bmjgh-2018-000771), 2018-06-09
Supplement: bmjgh-2018-000771supp001.pdf [file bmjgh-2018-000771supp001.pdf]

# Supplemental materials

## 1) Rating system for local private pharmaceutical distributors.

The rating system includes 5 quality assurance criteria, regrouping the 12 Model Quality Assurance System-activities. Each of the 12 activities is evaluated with a score ranging from 0-4, using an ordinal scale. For each of the 5 criteria, the MQAS-compliance is calculated as the average of the scores of its activities. Copied from Van Assche (unpublished 2016-2017).

| Rating system for local private pharmaceutical distributors |                                                                        |                                                             |                                                                                           |                                                                                   |                                                                                 |                                                                                 |                                                          |                                                                             |                                       |                                                                         |                                                                                             |
|-------------------------------------------------------------|------------------------------------------------------------------------|-------------------------------------------------------------|-------------------------------------------------------------------------------------------|-----------------------------------------------------------------------------------|---------------------------------------------------------------------------------|---------------------------------------------------------------------------------|----------------------------------------------------------|-----------------------------------------------------------------------------|---------------------------------------|-------------------------------------------------------------------------|---------------------------------------------------------------------------------------------|
| Selection of Sources                                        | Good Distribution Practices                                            |                                                             |                                                                                           |                                                                                   |                                                                                 | Cold Chain Management                                                           | General Quality Requirements                             |                                                                             |                                       | Self Inspection                                                         | Quality Control                                                                             |
|                                                             | Organisation of warehouse                                              | Physical storage conditions                                 | Stock control                                                                             | Control at reception                                                              | Distribution                                                                    |                                                                                 | Documents system                                         | Recall and complaints handling                                              | Human resources                       |                                                                         |                                                                                             |
| Selection of sources                                        |                                                                        |                                                             |                                                                                           |                                                                                   |                                                                                 | Cold Chain Management                                                           |                                                          |                                                                             |                                       |                                                                         | Quality control                                                                             |
| 4                                                           | Same as level 3 + pest control                                         | Same as level 3 + evidence of mapping                       | Same as level 3 + handling of discrepancies (with CAPA)                                   | SOP in place + correct control + QA supervision + conformity to qualified dossier | Dedicated area for order preparation, organized + SOP in place + QA supervision | Same as level 3 + evidence of mapping                                           | SOPs in place + system + quality manual + change control | Recall SOP + complaints handling SOP + CAPA linked to complaints and recall | Same as level 3 + GDP training        | Internal + external audit, follow up of corrective actions + indicators | QC in place + coherent sampling plan + correct selection of laboratory + CoA reviewed by QA |
| 3                                                           | Same as level 2 + good management of flows                             | Temperature and humidity are controlled and monitored       | Level 2 + evidence of periodic stock reconciliations                                      | SOP in place + correct control + QA supervision                                   | Dedicated area for order preparation, organized + SOP in place                  | Same as level 2 + consistent SOPs for cold chain management incl. deliveries    | SOPs in place + system + quality manual                  | Recall SOP + complaints handling SOP                                        | QA pharmacist + job description       | Internal audit with corrective actions follow up - no indicators        | QC in place + coherent sampling plan + correct selection of laboratory                      |
| 2                                                           | All key zones are clearly identified and compliant with WHO guidelines | Temperature is controlled and monitored                     | Stock control system: consistent documentation Evidence of FEO (control obsolete/expired) | SOP in place but weak control                                                     | Dedicated area for order preparation, organized but no SOP                      | Same as level 1 but "cold rooms" or fridges are controlled                      | SOPs in place + system but no quality manual             | Recall & complaints handling                                                | Pharmacist with some QA tasks/profile | Internal audit but no follow up of corrective actions                   | QC in place + coherent sampling plan but no laboratory selection criteria                   |
| 1                                                           | Warehouse is organized but not compliant with WHO guidelines           | Physical conditions are controlled but weakly               | Stock control in place but poorly documented                                              | No SOP but organized                                                              | Defined area for order preparation but no organization                          | "Cold rooms" or fridges are available but conditions are poorly controlled      | Some documents in place but no real system               | Recall or complaints handling                                               | At least one pharmacist               | Concept is known but no real system formalised                          | QC possible but no coherence - no sampling plan                                             |
| 0                                                           | Not organized                                                          | No control and/or physical conditions can harm the products | No evidence of consistent stock control system                                            | No SOP - unclear organization                                                     | Unorganized order preparation                                                   | The cold chain is poorly managed (upstream and/or internally and/or downstream) | Non existing                                             | Non existing or non documented                                              | No pharmacist                         | Unknown concept/Non existing                                            | Non existing                                                                                |
|                                                             |                                                                        |                                                             |                                                                                           |                                                                                   |                                                                                 | Not applicable                                                                  |                                                          |                                                                             |                                       |                                                                         |                                                                                             |

**2) Compliance of each local private distributor with the 5 quality assurance criteria: Sub-Saharan African countries.<sup>1</sup>**

The levels of MQAS-compliance range from a minimum of 0 to a maximum of 4. LIC: Low-income country, MIC: Middle-income country.

| Distributor | Country | Income group | Quality Assurance criteria          |                                    |                              |
|-------------|---------|--------------|-------------------------------------|------------------------------------|------------------------------|
|             |         |              | <i>General Quality Requirements</i> | <i>Good Distribution Practices</i> | <i>Cold Chain management</i> |
| #1          | A       | LIC          | 0,25                                | 0,60                               | -                            |
| #2          | B       | LIC          | 0,75                                | 0,40                               | 0                            |
| #3          | B       | LIC          | 0,75                                | 0,80                               | 0                            |
| #4          | B       | LIC          | 0,25                                | 0,80                               | 0                            |
| #5          | B       | LIC          | 0,50                                | 1,00                               | -                            |
| #6          | B       | LIC          | 0,25                                | 1,00                               | -                            |
| #7          | B       | LIC          | 1,25                                | 1,20                               | 1                            |
| #8          | B       | LIC          | 0,25                                | 0,40                               | 0                            |
| #9          | C       | LIC          | 0,25                                | 0,60                               | -                            |
| #10         | C       | LIC          | 1,25                                | 1,80                               | 0                            |
| #11         | C       | LIC          | 0,25                                | 1,00                               | 2                            |
| #12         | C       | LIC          | 0,75                                | 1,60                               | 1                            |
| #13         | C       | LIC          | 0,50                                | 0,40                               | -                            |
| #14         | C       | LIC          | 2,00                                | 2,60                               | -                            |
| #15         | C       | LIC          | 1,75                                | 1,80                               | 1                            |
| #16         | C       | LIC          | 1,00                                | 2,20                               | 2                            |
| #17         | C       | LIC          | 2,00                                | 2,60                               | 3                            |
| #18         | C       | LIC          | 1,25                                | 2,20                               | 2                            |
| #19         | D       | LIC          | 1,00                                | 0,80                               | 1                            |
| #20         | D       | LIC          | 0,25                                | 0,00                               | -                            |
| #21         | D       | LIC          | 0,75                                | 0,80                               | 2                            |
| #22         | D       | LIC          | 0,50                                | 0,20                               | -                            |
| #23         | E       | LIC          | 1,25                                | 1,20                               | 2                            |
| #24         | E       | LIC          | 0,50                                | 1,40                               | 0                            |
| #25         | E       | LIC          | 0,50                                | 0,80                               | 0                            |
| #26         | F       | MIC          | 1,25                                | 0,60                               | 0                            |
| #27         | G       | MIC          | 1,50                                | 2,20                               | -                            |
| #28         | G       | MIC          | 2,25                                | 2,40                               | 4                            |
| #29         | G       | MIC          | 0,25                                | 0,60                               | -                            |
| #30         | H       | MIC          | 3,00                                | 2,60                               | 2                            |

<sup>1</sup> Coded data. Motivated request to access data by country should be addressed to the corresponding author.

### 3) Compliance of each local private distributor with the 5 quality assurance criteria: non-Sub-Saharan African.<sup>2</sup>

The levels of MQAS-compliance range from a minimum of 0 to a maximum of 4. LIC: Low-income country, MIC: Middle-income country.

| Distributor | Country | Income group | Quality Assurance criteria          |                                    |                              |
|-------------|---------|--------------|-------------------------------------|------------------------------------|------------------------------|
|             |         |              | <i>General Quality Requirements</i> | <i>Good Distribution Practices</i> | <i>Cold Chain management</i> |
| #31         | I       | LIC          | 1,25                                | 2,00                               | 2                            |
| #32         | I       | LIC          | 1,50                                | 1,40                               | 1                            |
| #33         | I       | LIC          | 0,25                                | 0,60                               | -                            |
| #34         | I       | LIC          | 0,25                                | 1,40                               | 0                            |
| #35         | J       | MIC          | 0,25                                | 0,00                               | -                            |
| #36         | J       | MIC          | 0,50                                | 0,60                               | -                            |
| #37         | J       | MIC          | 1,25                                | 2,40                               | 2                            |
| #38         | J       | MIC          | 2,25                                | 3,60                               | 4                            |
| #39         | J       | MIC          | 2,50                                | 3,60                               | 3                            |
| #40         | J       | MIC          | 2,50                                | 2,00                               | 1                            |
| #41         | J       | MIC          | 2,75                                | 3,40                               | 4                            |
| #42         | J       | MIC          | 2,50                                | 3,40                               | 4                            |
| #43         | J       | MIC          | 2,75                                | 3,40                               | 4                            |
| #44         | J       | MIC          | 1,00                                | 1,40                               | 2                            |
| #45         | J       | MIC          | 1,50                                | 1,60                               | 2                            |
| #46         | K       | MIC          | 1,00                                | 1,80                               | 2                            |
| #47         | K       | MIC          | 0,75                                | 2,20                               | 1                            |
| #48         | K       | MIC          | 2,00                                | 2,00                               | -                            |
| #49         | K       | MIC          | 2,25                                | 2,40                               | 2                            |
| #50         | K       | MIC          | 0,25                                | 1,40                               | -                            |
| #51         | K       | MIC          | 3,25                                | 3,40                               | 4                            |
| #52         | K       | MIC          | 0,75                                | 0,80                               | 0                            |
| #53         | K       | MIC          | 0,25                                | 0,80                               | 2                            |
| #54         | K       | MIC          | 2,00                                | 2,40                               | 1                            |
| #55         | L       | MIC          | 2,50                                | 3,00                               | 3                            |
| #56         | L       | MIC          | 2,50                                | 2,00                               | 3                            |
| #57         | L       | MIC          | 2,50                                | 2,00                               | 3                            |
| #58         | L       | MIC          | 2,25                                | 1,60                               | 2                            |
| #59         | L       | MIC          | 0,50                                | 0,20                               | -                            |
| #60         | M       | MIC          | 1,50                                | 2,80                               | 3                            |

<sup>2</sup> Coded data. Motivated request to access data by country should be addressed to the corresponding author
